# Supplementary material
Source: HighWire-hosted journal article supplement (http://www.cmaj.ca/highwire/filestream/59510/field_highwire_adjunct_files/0/150660-dec-1-at.pdf)
Supplement: 150660-dec-1-at.pdf [file 150660-dec-1-at.pdf]

## **Appendix 1: Resources for physicians, nurses, physiotherapists, pharmacists and patients**

- Choosing Wisely Canada ([www.choosingwiselycanada.org](http://www.choosingwiselycanada.org))
- TOP (Toward Optimized Practice) Alberta evidence-informed primary care management of low-back pain: [www.topalbertadoctors.org/cpgs/885801](http://www.topalbertadoctors.org/cpgs/885801)
- CORE (Clinically Organized Relevant Exam) Back Tool: [www.effectivepractice.org/site/ywd\\_effectivepractice/assets/pdf/2.\\_core\\_tool\\_eng.pdf](http://www.effectivepractice.org/site/ywd_effectivepractice/assets/pdf/2._core_tool_eng.pdf)
- Cochrane Back and Neck systematic reviews: <http://back.cochrane.org/>
- RxFiles: [www.rxfiles.ca/rxfiles/](http://www.rxfiles.ca/rxfiles/)
- Opioid Manager (app for physicians) and My Opioid Manager (app for patients): [www.opioidmanager.com](http://www.opioidmanager.com)
- YouTube video on low-back pain, by Dr. Mike Evans: <https://www.youtube.com/watch?v=BOjTegn9RuY>
